# Supplementary material
Source: PubMed Central journal article supplement (PMC8933618)
Supplement: NIHMS1785258-supplement-1.pdf [file NIHMS1785258-supplement-1.pdf]

# Supporting Information

## **Single Cell Mass Spectrometry Analysis of Drug-Resistant Cancer Cells: Metabolomics Studies of Synergetic Effect of Combinational Treatment**

Authors: Xingxiu Chen, Mei Sun, Zhibo Yang\*

### AUTHOR ADDRESS

Department of Chemistry and Biochemistry, University of Oklahoma, Norman, Oklahoma  
73019, USA

\*Address reprint requests to Dr. Zhibo Yang, Department of Chemistry and Biochemistry,  
University of Oklahoma, Norman, Oklahoma 73019, USA

Tel: (405) 325-1772

Email: [Zhibo.Yang@ou.edu](mailto:Zhibo.Yang@ou.edu)

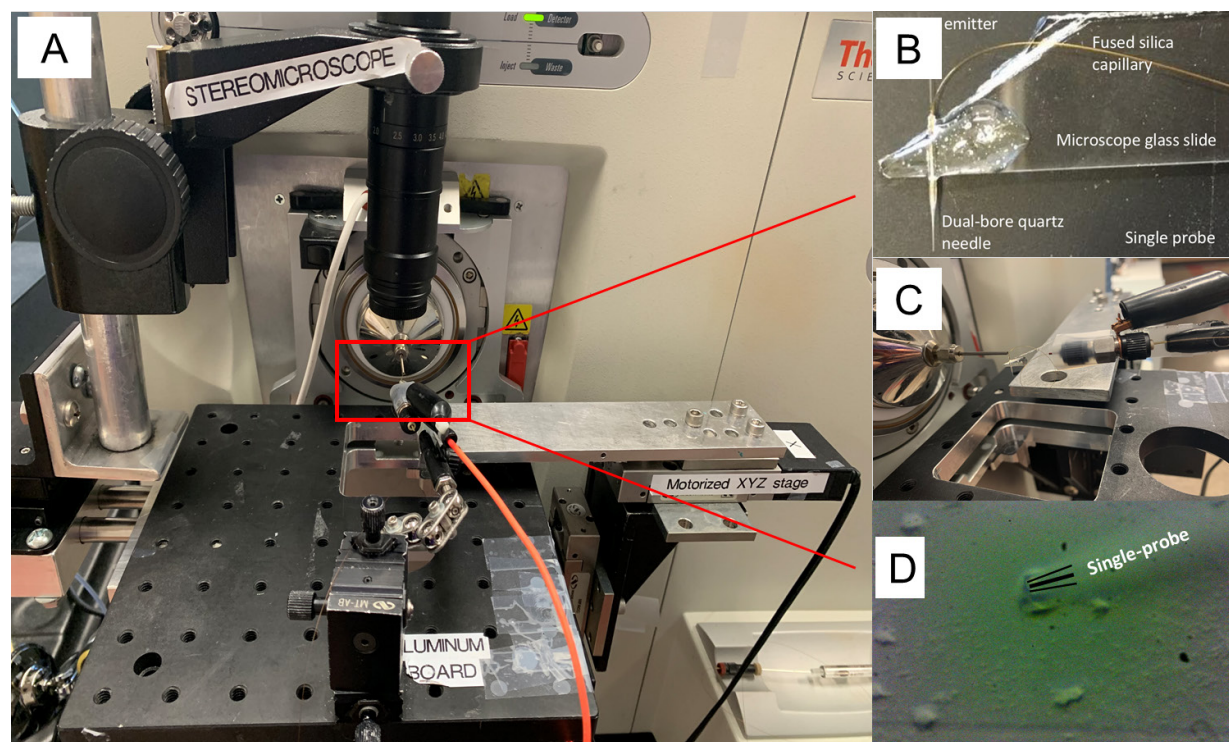

Figure S1. (A) The Single-probe SCMS setup. (B) Image of a fabricated Single-probe. A Single-probe is fabricated by inserting the fused silica capillary (OD 105  $\mu\text{m}$ ) and nano-ESI emitter (OD 105  $\mu\text{m}$ ) into the dual-bore quartz needle. A dual-bore quartz tubing (OD 500  $\mu\text{m}$ ; ID 127  $\mu\text{m}$ ) is pulled into a needle (tip size  $\sim 10$   $\mu\text{m}$ ) using a laser micropipette puller. The OD of the bores in the dual-bore needle is gradually reduced from 500 to  $\sim 10$   $\mu\text{m}$  after laser pulling, and the fused silica capillary has a tight contact and seal with the inner wall of the dual-bore quartz tubing at the tapering part. This type of tight connection is secured using the UV epoxy. (C) A sideview of the Single-probe coupled with the Thermo Orbitrap XL mass spectrometer. The Single-probe is connected with the solvent-providing capillary through a conductive union. The sampling solvent is continuously delivered by a syringe pump with controlled flowrates. The ionization voltage is applied on the conductive union and transmitted to the nanoESI emitter via liquid inside the capillaries. (D) A typical microscopy image of single cells analyzed using the Single-probe device. Single cells are selected and analyzed by precisely moving the motorized XYZ-stage system, and the entire process is monitored using a digital stereomicroscope. The ion signals of the cell will be continuously collected and monitored till the signals completely disappear (usually ion signals from a cell can last for 20-25 s). The Z-stage will be lowered down, and the solvent will be continuously used to flush the inner channel of the probe (e.g., for 30 s) to ensure the ion signals from the cell completely disappear prior to the analysis of the next cell.

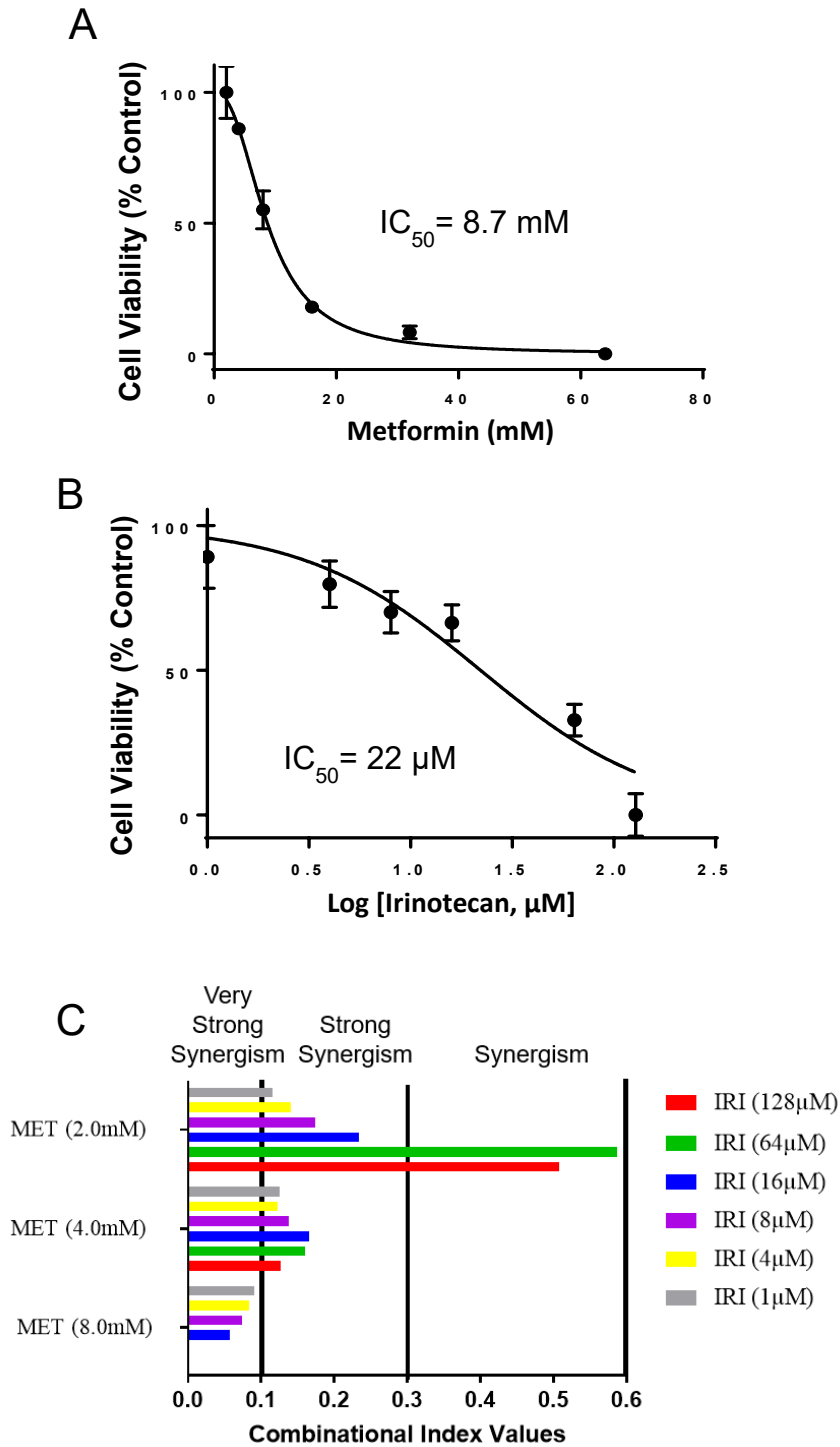

Figure S2. (A) Cell viability measurement of irinotecan (IRI)-resistant cells treated by metformin (MET). (B) Cell viability measurement of IRI-resistant cells treated by IRI. (C) Histogram of combinational index values assessing the degree of synergism: very strong ( $CI < 0.1$ ), strong ( $0.1 < CI < 0.3$ ), and synergism ( $0.3 < CI < 0.7$ ).

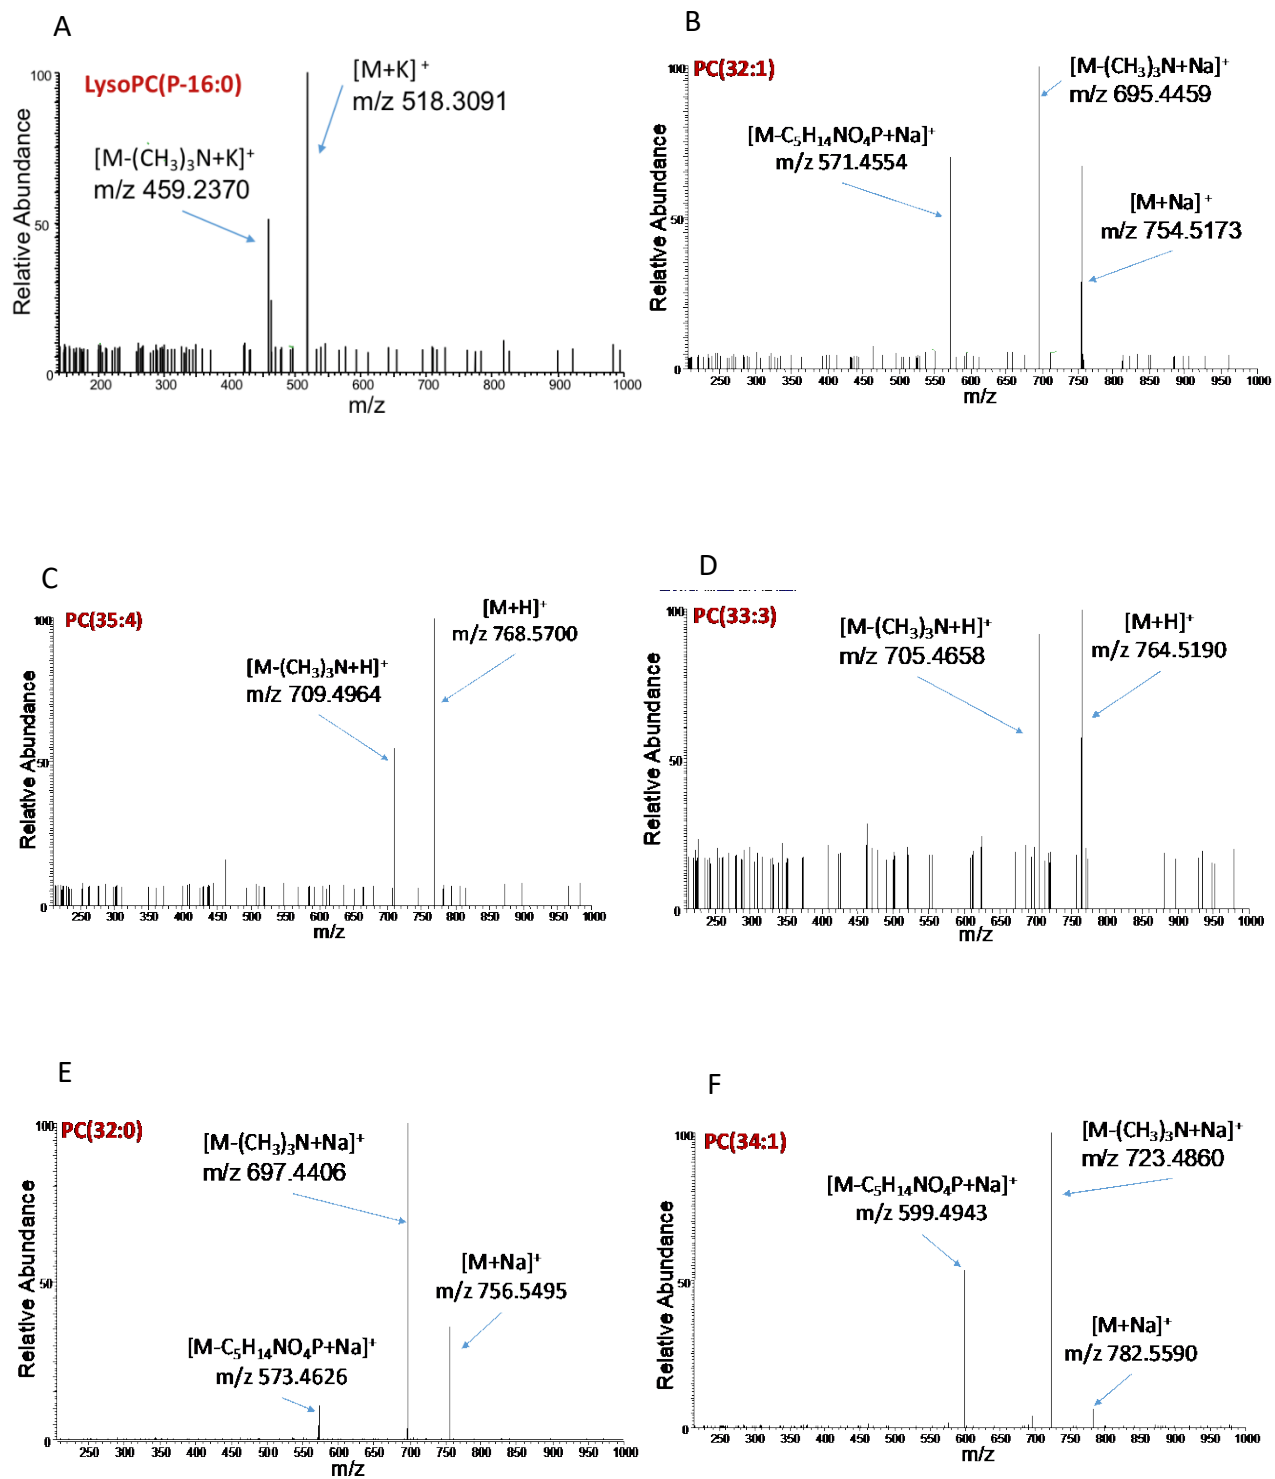

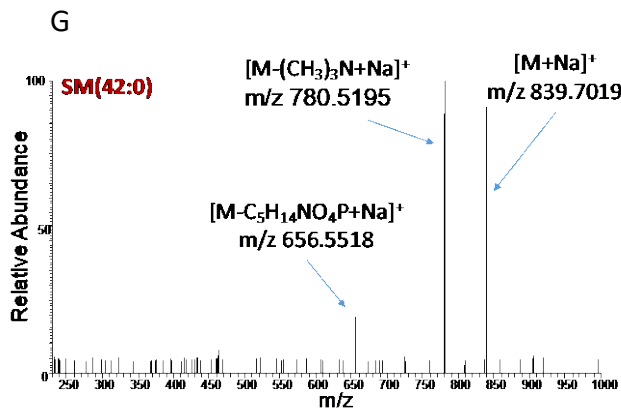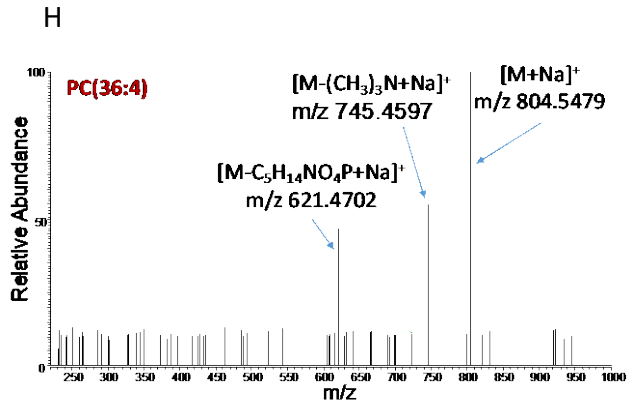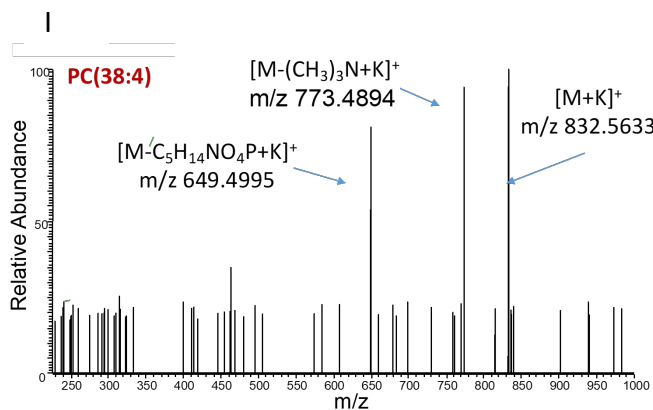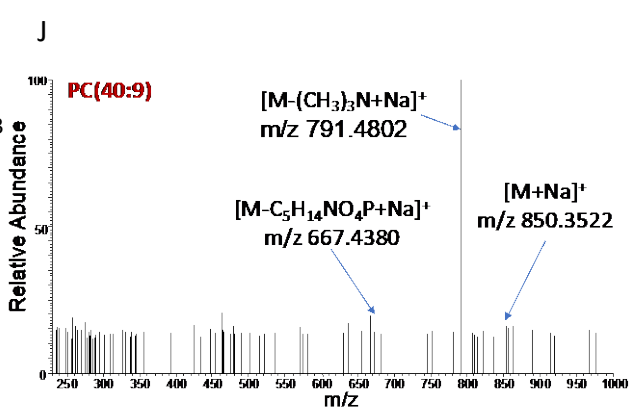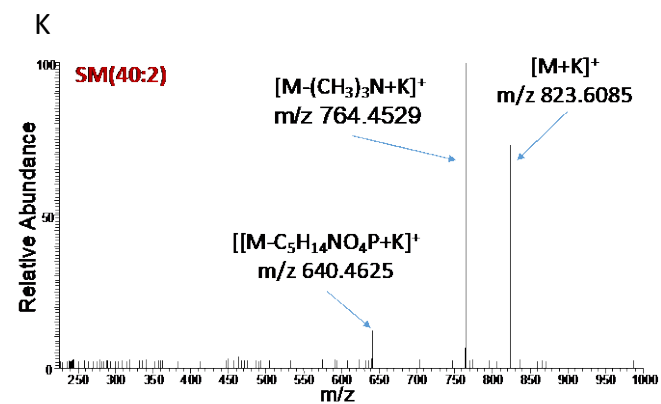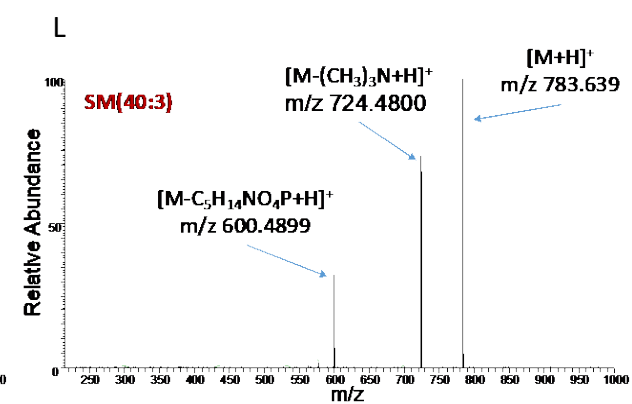

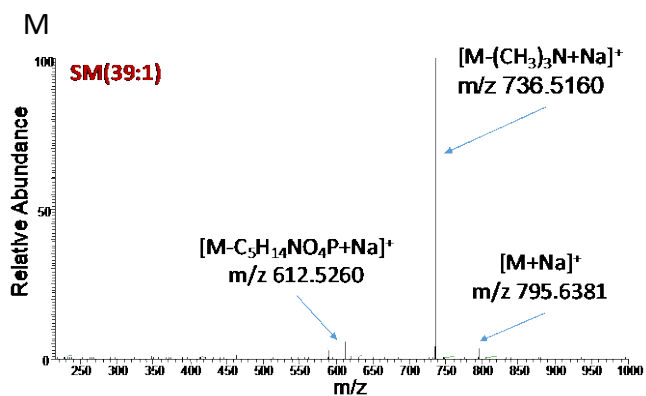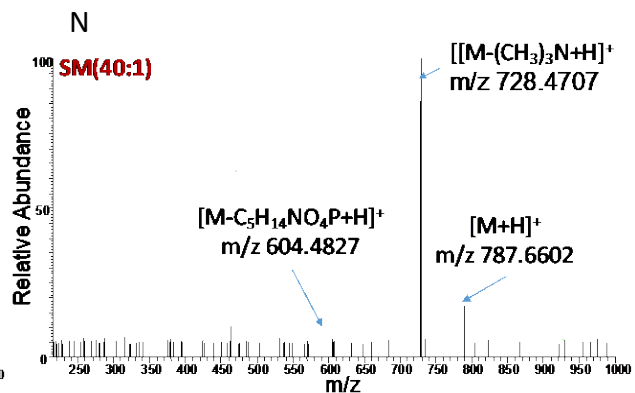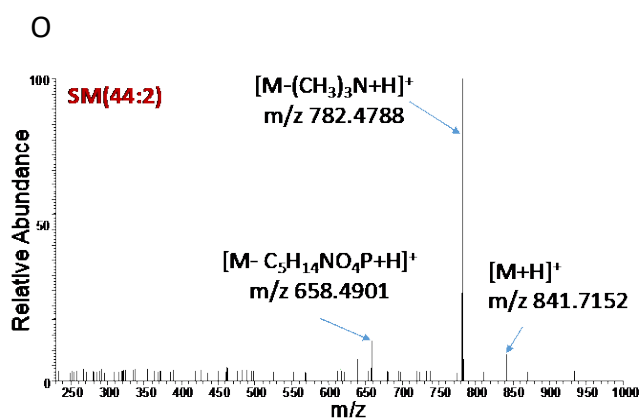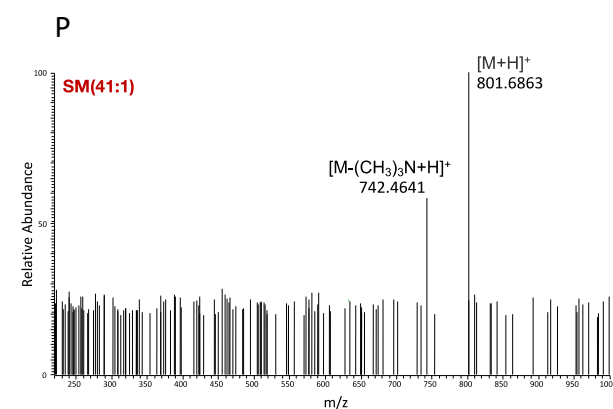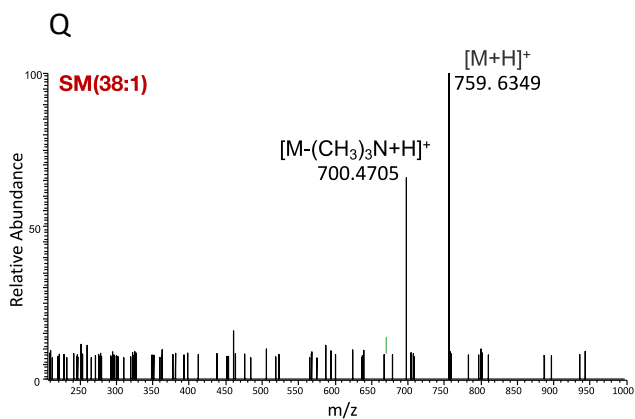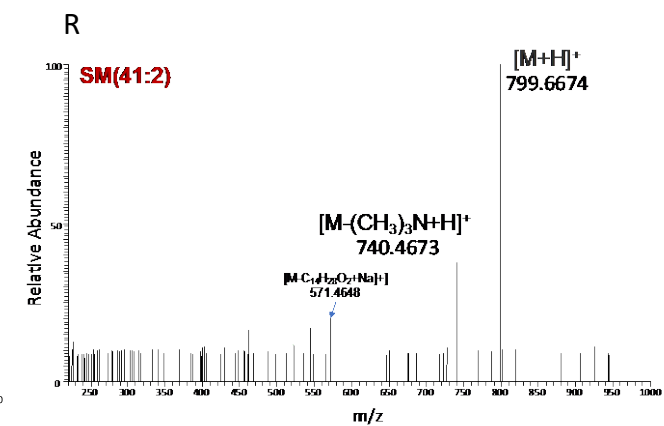

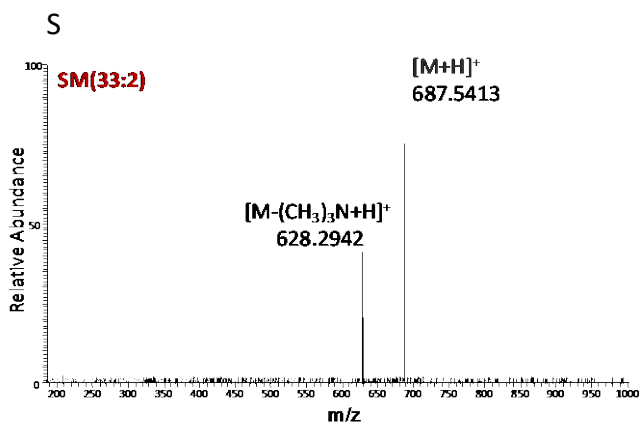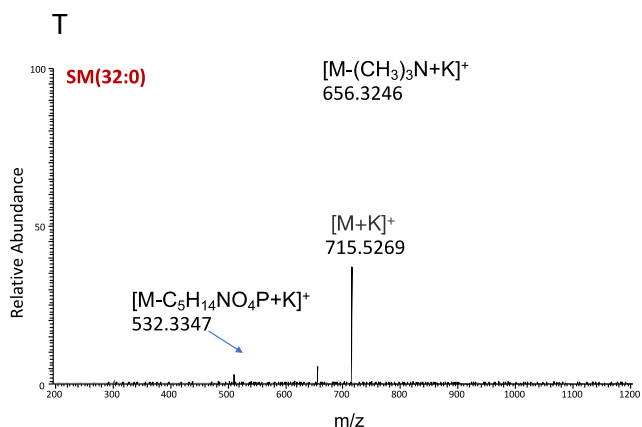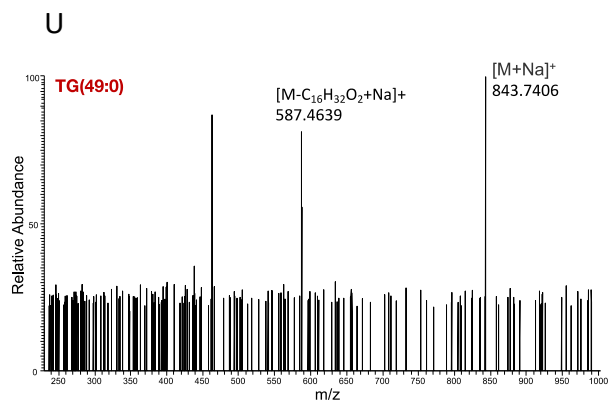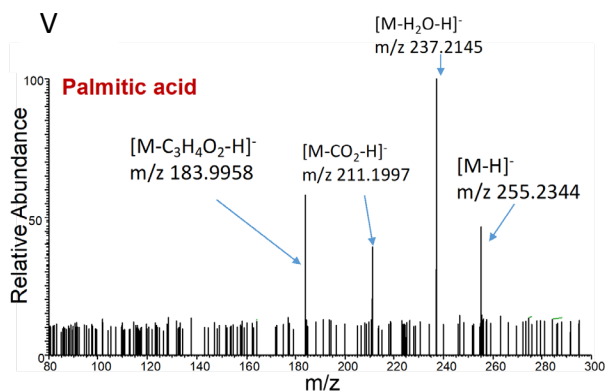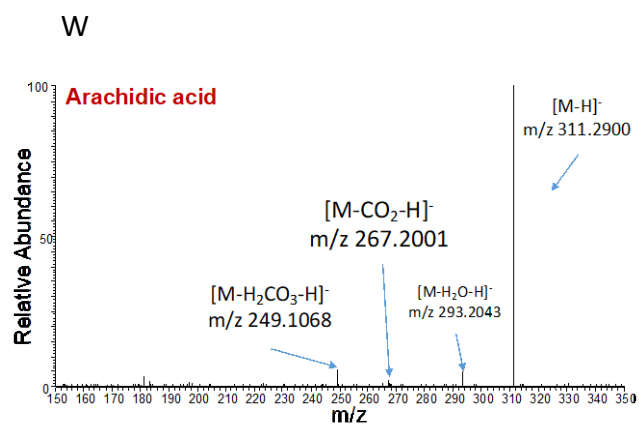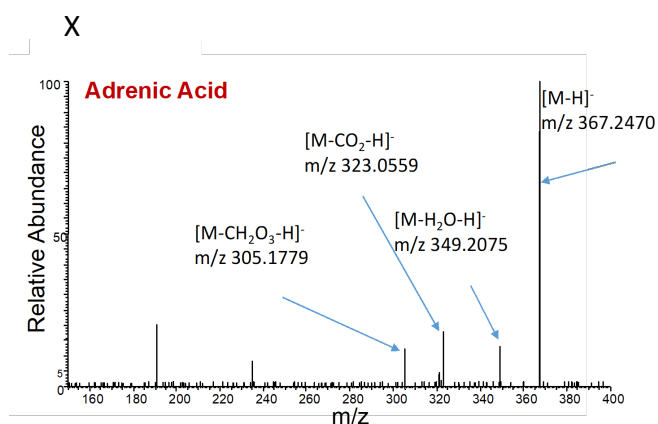

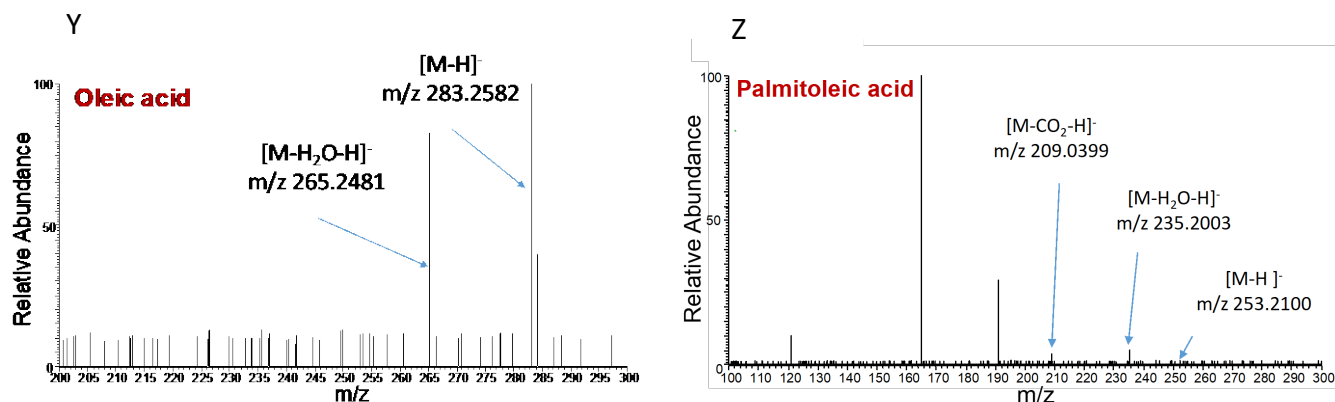

Figure S3. Online MS<sup>2</sup> identification of metabolites in single IRI-resistant cells using the Single-probe SCMS technique. (A) LysoPC(P-16:0), (B) PC(31:1), (C) PC(35:4), (D) PC(33:3), (E) PC(32:0), (F) PC(34:1), (G) SM(42:0), (H) PC(36:4), (I) PC(38:4), (J) PC(40:9), (K) SM(40:2), (L) SM(40:3), (M) SM(39:1), (N) SM(40:1), (O) SM(44:2), (P) SM(41:1) (Q) SM(38:1) (R) SM(41:2) (S) SM(33:2) (T) SM(32:0) (U) TG(49:0) (V) Palmitic acid, (W) Arachidic acid, (X) Adrenic acid, (Y) Oleic acid, and (Z) Palmitoleic acid. (LysoPC: lysophosphatidylcholine; PC: phosphatidylcholine; SM: sphingomyelin; TG: triglyceride).



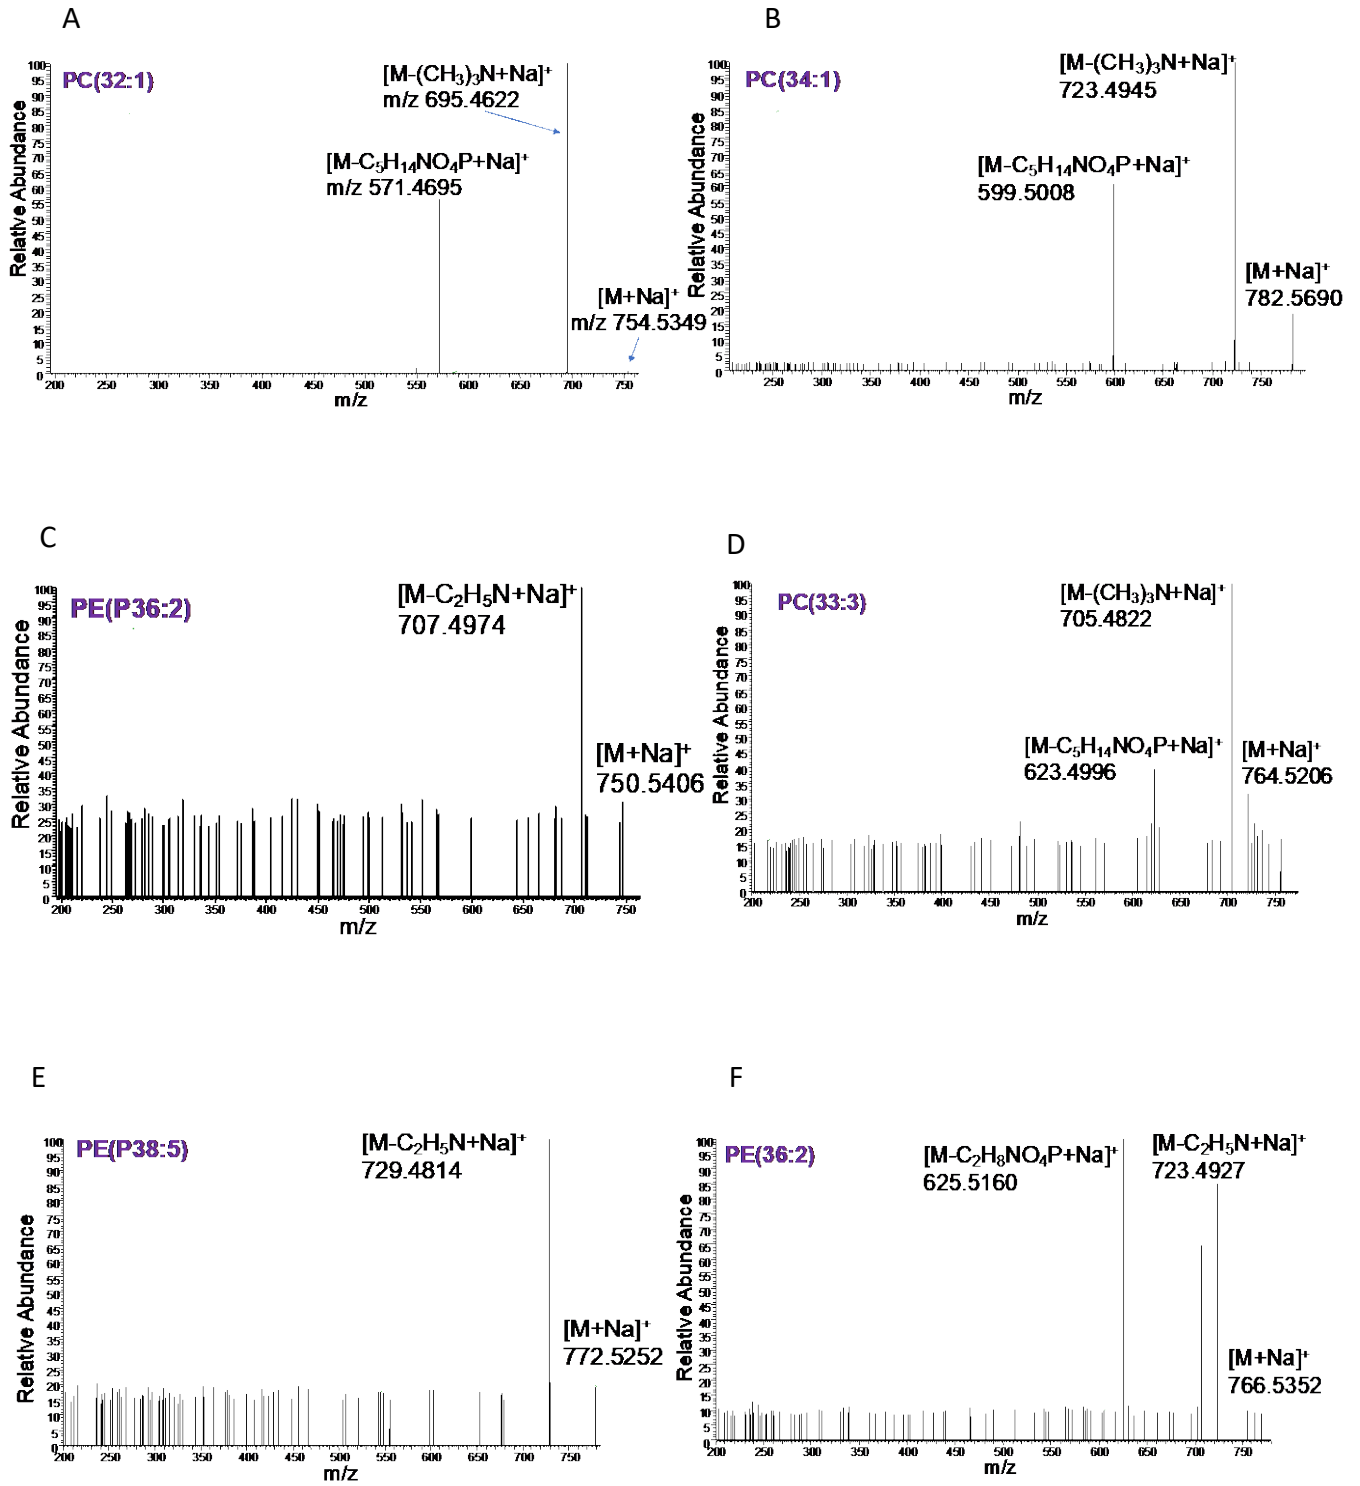

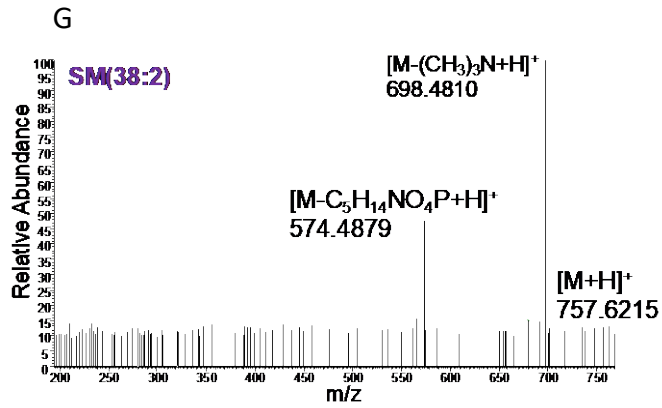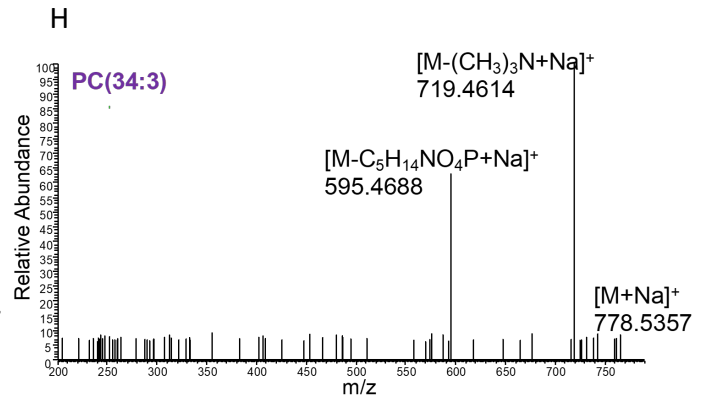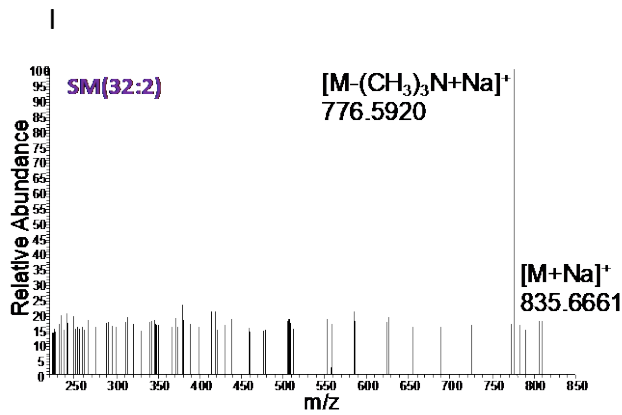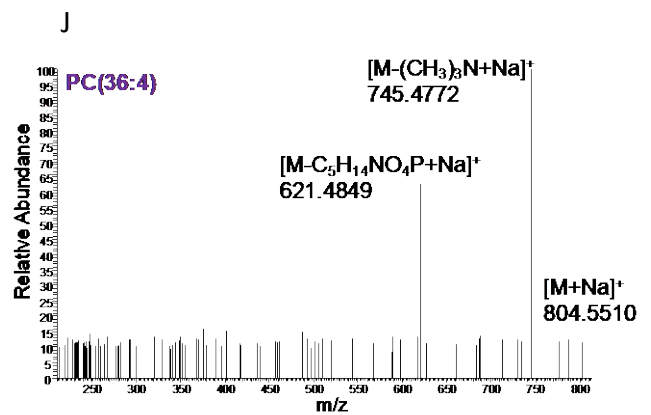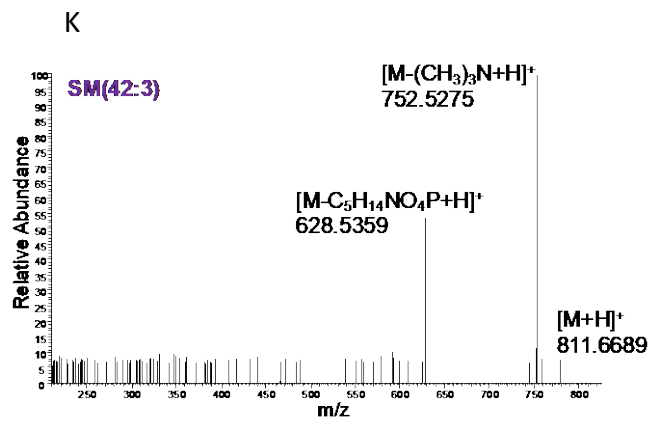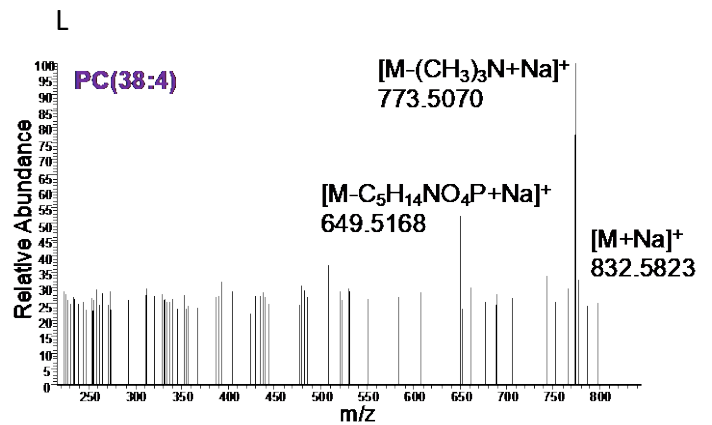

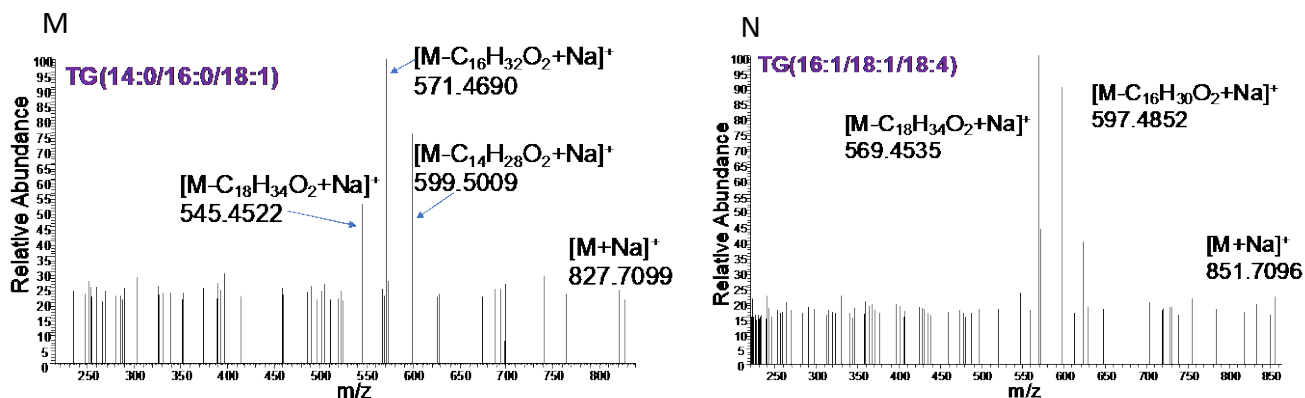

Figure S4. MS<sup>2</sup> identification of ions of interest from cell lysate using HPLC-MS/MS. These ions include (A) PC(32:1), (B) PC(34:1), (C) PE(P36:2), (D) PC(33:3), (E) PE(P38:5), (F) PE(36:2), (G) SM(38:2), (H) PC(34:3), (I) SM(32:2), (J) PC(36:4), (K) SM(42:3), (L) PC(38:4), (M) TG(14:0/16:0/18:1), and (N) TG(16:1/18:1/18:4). (PC: phosphatidylcholine; PE: Phosphatidylethanolamine; SM: sphingomyelin; TG: triglyceride).

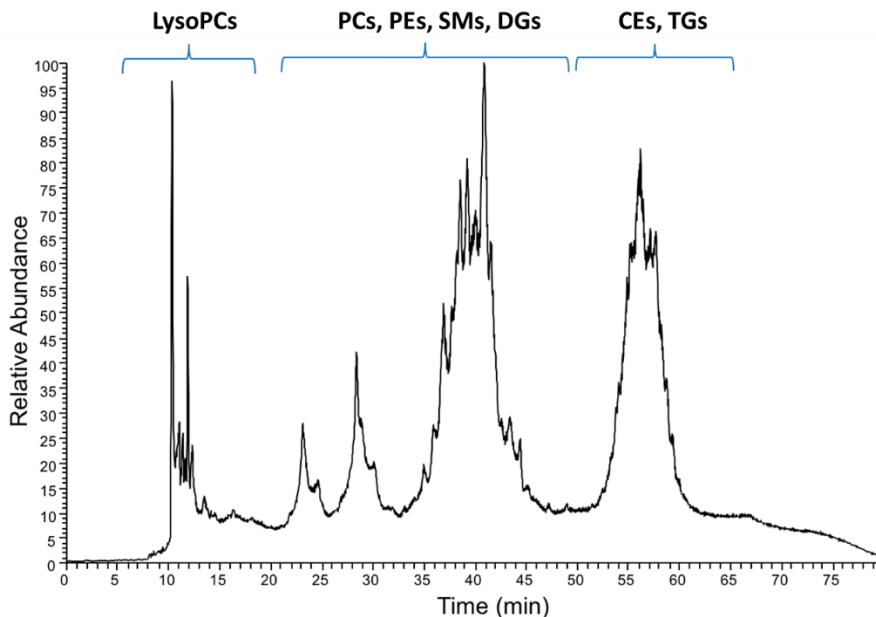

Figure S5. Chromatogram of cell lysate in HPLC-MS analysis. (LysoPC: lysophosphatidylcholine; PC: phosphatidylcholine; PE: Phosphatidylethanolamine; SM: sphingomyelin; CE: cholesterol ester; DG: diglyceride; TG: triglyceride).
